# Supplementary material for: Ultra-stable narrowband green-emitting CsPbBr3 quantum dot-embedded glass ceramics for wide color gamut backlit displays
Source: Royal Society of Chemistry journal article supplement (doi:10.1039/d2tc00906d), 2022-01-01
Supplement: d2tc00906d1.pdf [file d2tc00906d1.pdf]

## Supporting information

### **Ultra-stable narrowband green emitting CsPbBr<sub>3</sub> quantum dots embedded glass ceramics for wide color gamut backlit display**

Jidong Lin <sup>a,b,+</sup>, Shaoxiong Wang <sup>a,+</sup>, Guohua Chen <sup>a</sup>, Runyu Chen <sup>a</sup>, Shuxin Chen <sup>a</sup>, Naizhong Jiang <sup>a</sup>, Feng Huang <sup>a,\*</sup>, Yuanhui Zheng <sup>b,e</sup>, Yongping Zheng <sup>a</sup>, Daqin Chen <sup>a,b,c,d,\*</sup>

<sup>a</sup> College of Physics and Energy, Fujian Normal University, Fujian Provincial Key Laboratory of Quantum Manipulation and New Energy Materials, Fuzhou, 350117, China

<sup>b</sup> Fujian Science & Technology Innovation Laboratory for Optoelectronic Information, Fuzhou, 350116, China

<sup>c</sup> Fujian Provincial Collaborative Innovation Center for Advanced High-Field Superconducting Materials and Engineering, Fuzhou, 350117, China

<sup>d</sup> Fujian Provincial Engineering Technology Research Center of Solar Energy Conversion and Energy Storage, Fuzhou, 350117, China

<sup>e</sup> College of Chemistry, Fuzhou University, Fuzhou, 350116, China

Corresponding authors

E-Mail: [fengh@fjnu.edu.cn](mailto:fengh@fjnu.edu.cn) (F. Huang); [dqchen@fjnu.edu.cn](mailto:dqchen@fjnu.edu.cn) (D. Q. Chen)

**Table S1.** The spectral data of CsPbBr<sub>3</sub>@glass prepared by different one-step heat-treatment temperatures and times.

| Heat-treatment condition (°C) | Emission peak (nm) | PLQY (%) | FWHM (nm) | Decay (ns) |
|-------------------------------|--------------------|----------|-----------|------------|
| 460/6h                        | 519                | 37       | 25.46     | 47.80      |
| 480/2h                        | 520                | 40.43    | 25.74     | 49.87      |
| 500/2h                        | 521                | 52.85    | 27.70     | 65.87      |
| 520/0.5h                      | 520                | 51.98    | 26.10     | 35.35      |
| 540/0.5h                      | 519                | 54.68    | 26.76     | 37.84      |
| 560/10min                     | 520                | 53.68    | 26.35     | 34.53      |
| 580/3min                      | 514                | 50.69    | 28.74     | 20.97      |
| 600/5min                      | 521                | 51.18    | 25.81     | 43.64      |

**Table S2.** The spectral data of CsPbBr<sub>3</sub>@glass prepared by two-step heat treatment (600 °C high-temperature rapid nucleation and 460 °C low-temperature slow growth) at different times.

| Heat treatment condition (°C) | Emission peak (nm) | PLQY (%) | FWHM (nm) | Decay (ns) |
|-------------------------------|--------------------|----------|-----------|------------|
| 600/15min-460/1h              | 515                | 60.25    | 26.24     | 22.95      |
| 600/30min-460/1h              | 524                | 36.88    | 22.28     | 109.4      |
| 600/1h-460/1h                 | 525                | 16.24    | 22.98     | 165.43     |
| 600/30min-460/15min           | 523                | 25.05    | 24.53     | 98.97      |
| 600/30min-460/30min           | 524                | 25.17    | 22.54     | 105.29     |
| 600/30min-460/1h              | 524                | 36.88    | 22.28     | 109.4      |
| 600/30min-460/2h              | 525                | 22.99    | 22.84     | 114.37     |
| 600/30min-460/4h              | 524                | 26.76    | 23.43     | 105.25     |

**Table S3.** The spectral data of CsPbBr<sub>3</sub>@glass prepared by two-step heat treatment (460 °C low-temperature slow nucleation and 600 °C high-temperature rapid growth) at different times.

| Heat treatment temperature (°C) | Emission peak (nm) | PLQY (%) | FWHM (nm) | Decay (ns) |
|---------------------------------|--------------------|----------|-----------|------------|
| 460/1h-600/15min                | 514                | 54.97    | 27.31     | 21.90      |
| 460/1h-600/30min                | 523                | 35.11    | 23.07     | 98.93      |
| 460/1h-600/1h                   | 525                | 20.44    | 23.05     | 149.12     |
| 460/15min-600/30min             | 524                | 27.41    | 23.19     | 107.48     |
| 460/30min-600/30min             | 524                | 24.75    | 22.92     | 104.88     |
| 460/1h-600/30min                | 523                | 35.11    | 23.07     | 98.93      |
| 460/2h-600/30min                | 525                | 23.05    | 23.2      | 122.38     |
| 460/4h-600/30min                | 525                | 30.92    | 22.74     | 106.46     |

**Table S4.** The illuminance values of single-side embedded, double-side embedded, quad-side embedded, and straight-down blue light guide panels tested by the nine-point measuring method.

| Irradiation intensity (W/m <sup>2</sup> ) |                 |               |                   |
|-------------------------------------------|-----------------|---------------|-------------------|
| single-side LGP                           | double-side LGP | quad-side LGP | straight-down LGP |
| 69.73                                     | 132.40          | 242.80        | 14.42             |
| 71.28                                     | 133.70          | 247.20        | 14.68             |
| 72.10                                     | 138.70          | 251.70        | 15.29             |
| 73.97                                     | 143.10          | 253.60        | 16.03             |
| 73.99                                     | 144.30          | 254.40        | 16.13             |
| 76.38                                     | 146.10          | 257.90        | 16.25             |
| 78.35                                     | 146.50          | 260.10        | 21.51             |
| 82.52                                     | 149.60          | 262.80        | 22.36             |
| 87.26                                     | 150.10          | 263.70        | 24.52             |

**Table S5.** The minimum ( $E_{\min}$ ) and average ( $E_{\text{ave}}$ ) illuminance values of single-side embedded, double-side embedded, quad-side embedded, and straight-down blue light guide panels tested by the nine-point measuring method to calculate illumination uniformity of LGP ( $U_0$ ).

| single-side LGP        | double-side LGP         | quad-side LGP           | straight-down LGP      |
|------------------------|-------------------------|-------------------------|------------------------|
| $E_{\min}=69.73$       | $E_{\min}=132.40$       | $E_{\min}=242.80$       | $E_{\min}=14.42$       |
| $E_{\text{ave}}=76.18$ | $E_{\text{ave}}=142.72$ | $E_{\text{ave}}=254.91$ | $E_{\text{ave}}=17.91$ |
| $U_0=91.5$             | $U_0=92.8\%$            | $U_0=95.2\%$            | $U_0=80.5\%$           |

**Table S6.** CIE color coordinates for NTSC 1953 standard, Rec.2020 standard, commercial backlit display, and the CsPbBr<sub>3</sub>@glass@PDMS (sample A, narrow FWHM) based backlit displays with/without color filters.

|       | NTSC             | Rec.2020           | Commercial backlit display | With color filter  | Without color filter |
|-------|------------------|--------------------|----------------------------|--------------------|----------------------|
| Red   | (0.67, 0.33)     | (0.7079, 0.2920)   | (0.6227, 0.3396)           | (0.6873,0.3028)    | (0.691,0.3088)       |
| Green | (0.21, 0.71)     | (0.1702, 0.7965)   | (0.3142, 0.6007)           | (0.1699,0.7202)    | (0.1511,0.7794)      |
| Blue  | (0.14, 0.08)     | (0.1314, 0.0459)   | (0.1495, 0.0423)           | (0.1447,0.0782)    | (0.1463,0.0321)      |
| Area  | 0.1582<br>(100%) | 0.2116<br>(133.8%) | 0.1076<br>(68%)            | 0.1713<br>(108.3%) | 0.2029<br>(128.2%)   |

**Table S7.** CIE color coordinates for NTSC 1953 standard, Rec.2020 standard, commercial backlit display, and the CsPbBr<sub>3</sub>@glass@PDMS (sample B, wide FWHM) based backlit displays with/without color filters.

|       | NTSC             | Rec.2020           | Commercial backlit display | With color filter  | Without color filter |
|-------|------------------|--------------------|----------------------------|--------------------|----------------------|
| Red   | (0.67, 0.33)     | (0.7079, 0.2920)   | (0.6227, 0.3396)           | (0.6859, 0.3019)   | (0.689,0.3108)       |
| Green | (0.21, 0.71)     | (0.1702, 0.7965)   | (0.3142, 0.6007)           | (0.1443, 0.694)    | (0.1174,0.7605)      |
| Blue  | (0.14, 0.08)     | (0.1314, 0.0459)   | (0.1495, 0.0423)           | (0.1417,0.805)     | (0.1467,0.0311)      |
| Area  | 0.1582<br>(100%) | 0.2116<br>(133.8%) | 0.1076<br>(68%)            | 0.1666<br>(105.3%) | 0.2019<br>(127.6%)   |

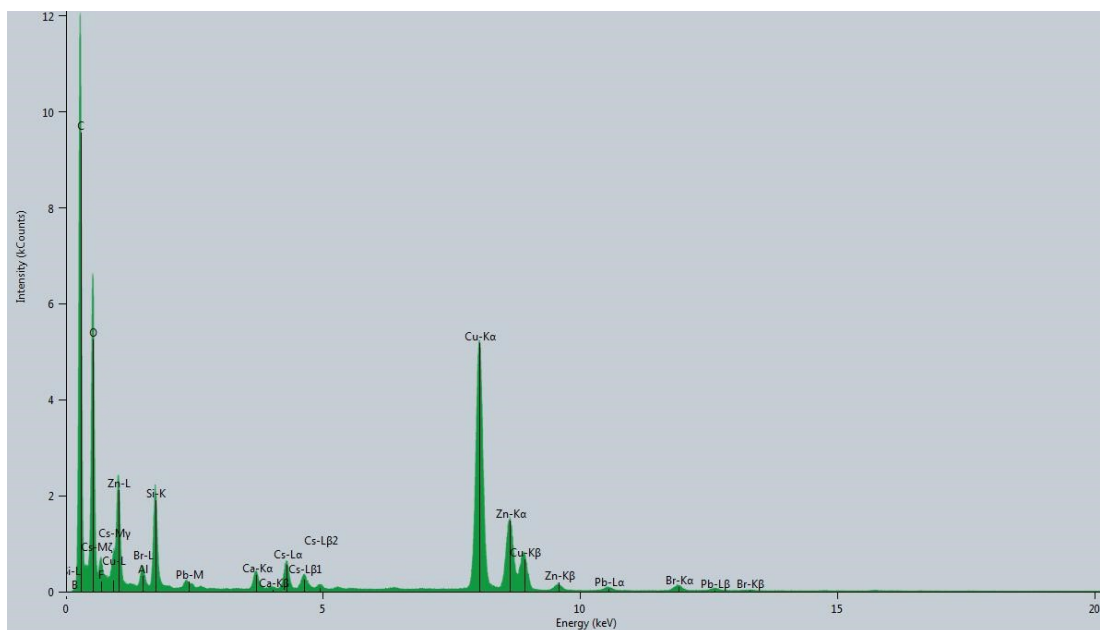

**Figure S1.** EDX spectrum of the as-prepared glass, showing the presence of Si, B, Zn, O, Ca, F, Cs, Pb and Br elemental signals.

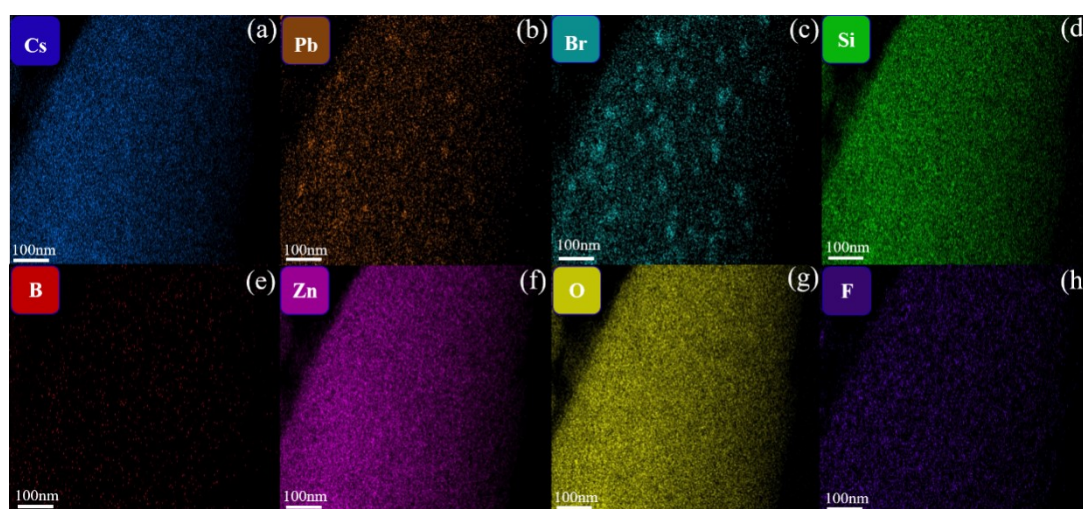

**Figure S2.** Elemental mapping images for the CsPbBr<sub>3</sub> PQDs embedded glass.

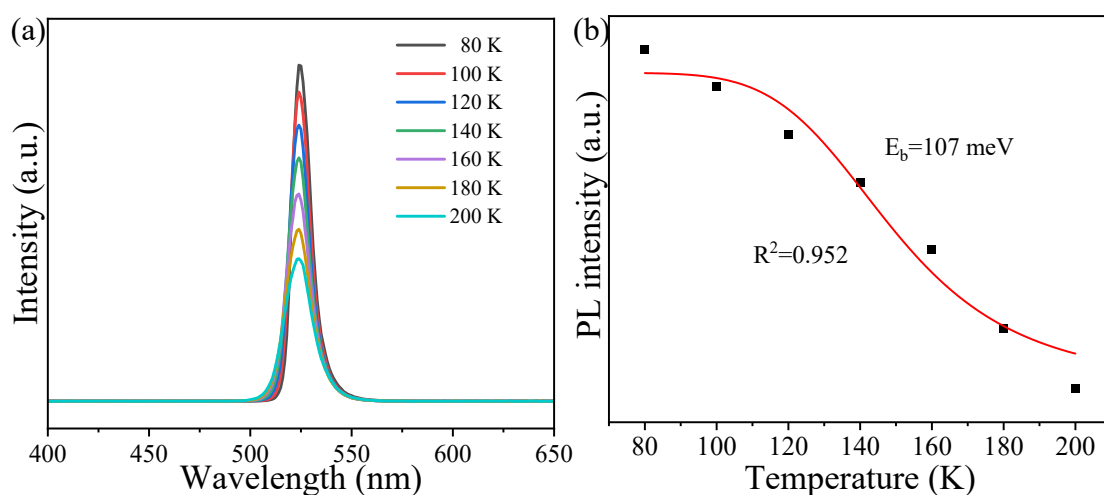

**Figure S3.** (a) Temperature dependence of PL spectra of CsPbBr<sub>3</sub>@glass sample. (b) The integrated emission intensity as a function of temperature from 80 K to 200 K and the fitted curve to evaluate exciton binding energy of 107 meV.

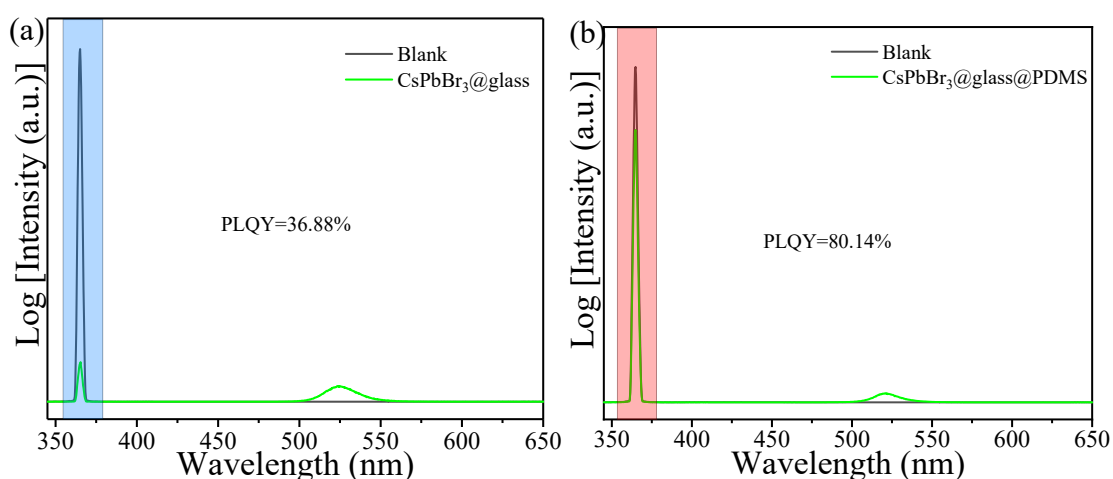

**Figure S4.** Quantitative PL spectra of (a) CsPbBr<sub>3</sub>@glass sample and (b) CsPbBr<sub>3</sub>@glass@PDMS mixture for the determination of absolute PLQYs.

Notably, the PLQY for the sample by single-step treatment can reach as high as ~100% by diluting the sample in PDMS. Unfortunately, their FWHMs are 26-28 nm and the peak emission wavelengths are 514-521 nm, which are not suitable for achieving a wide color gamut backlight display, especially after passing the color filters.



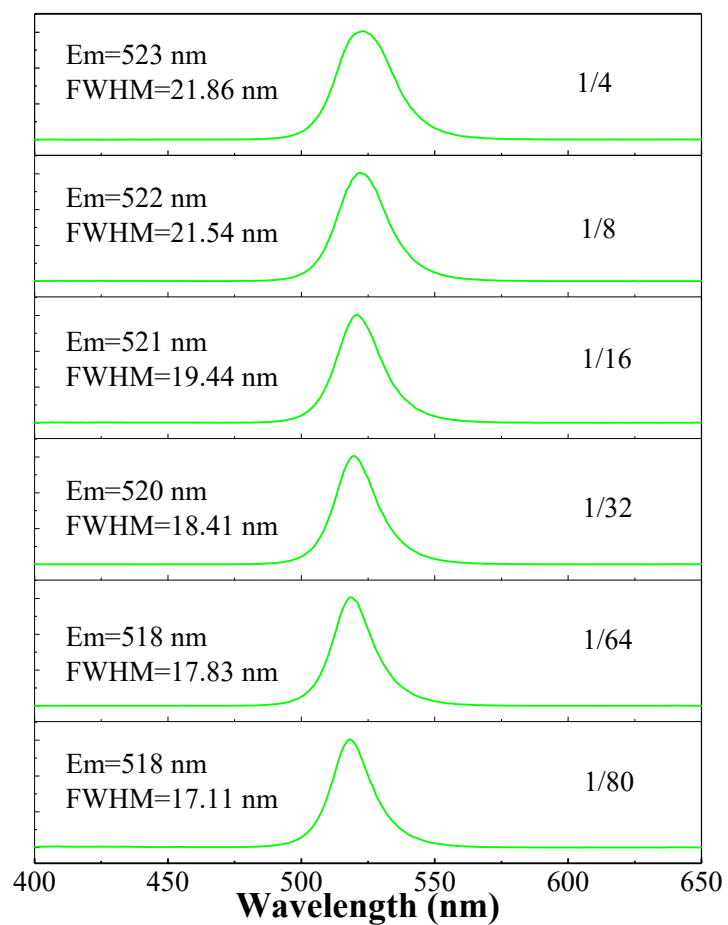

**Figure S5.** The dependence of PL spectrum for the (CsPbBr<sub>3</sub>@glass@PDMS) green film on the [CsPbBr<sub>3</sub>@glass]/PDMS weight ratio.

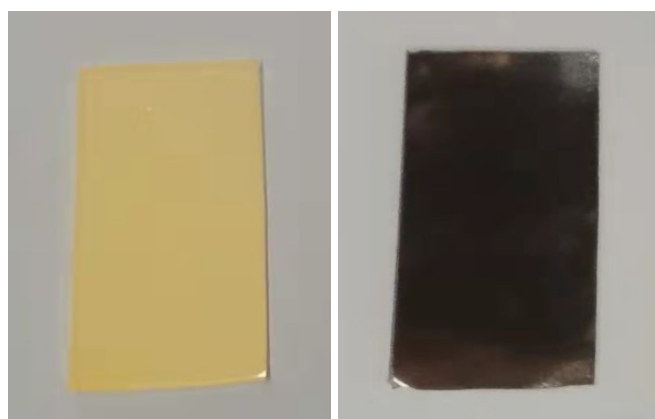

**Figure S6.** Photographs of the composite film containing CsPbBr<sub>3</sub>@glass and Mn: KSF powders without boiling (left) and after boiling at 85°C for 36 h (right).

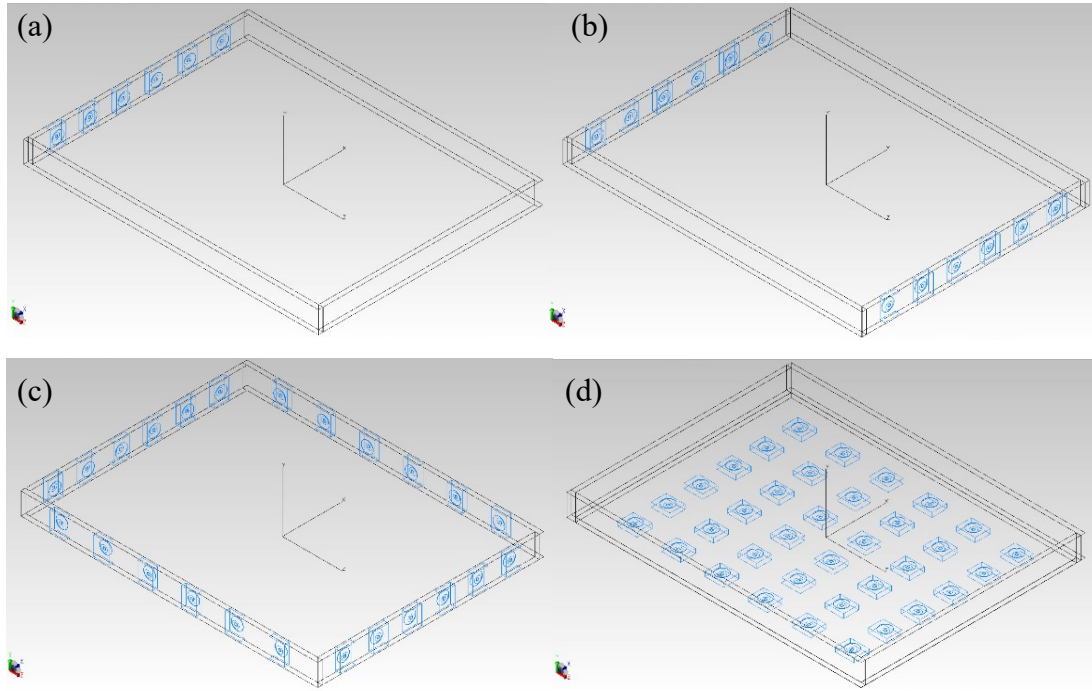

**Figure S7.** Schematic illustration of (a) single-side embedded, (b) double-side embedded, (c) quad-side embedded, and (d) straight-down blue light guide panels.

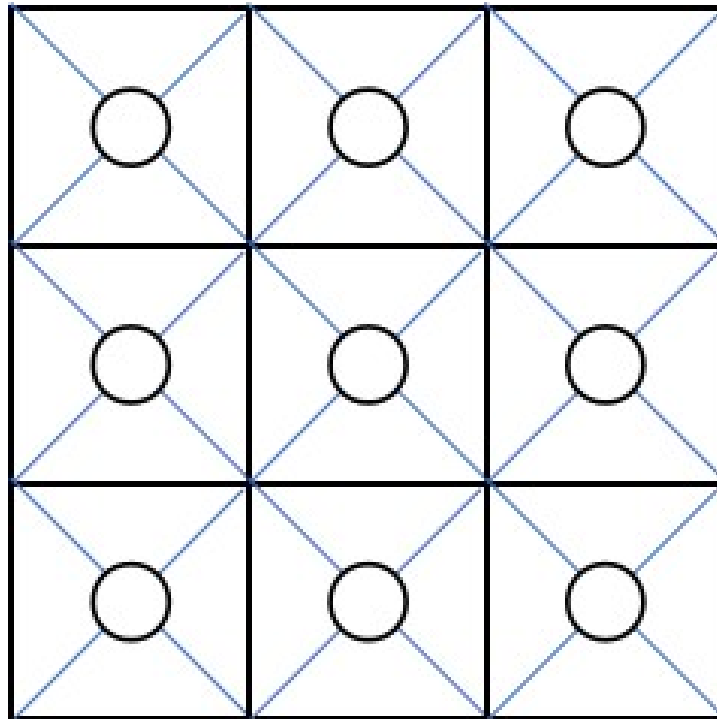

**Figure S8.** The schematic diagram of the nine-point measuring method to determine illumination uniformity of LGP.

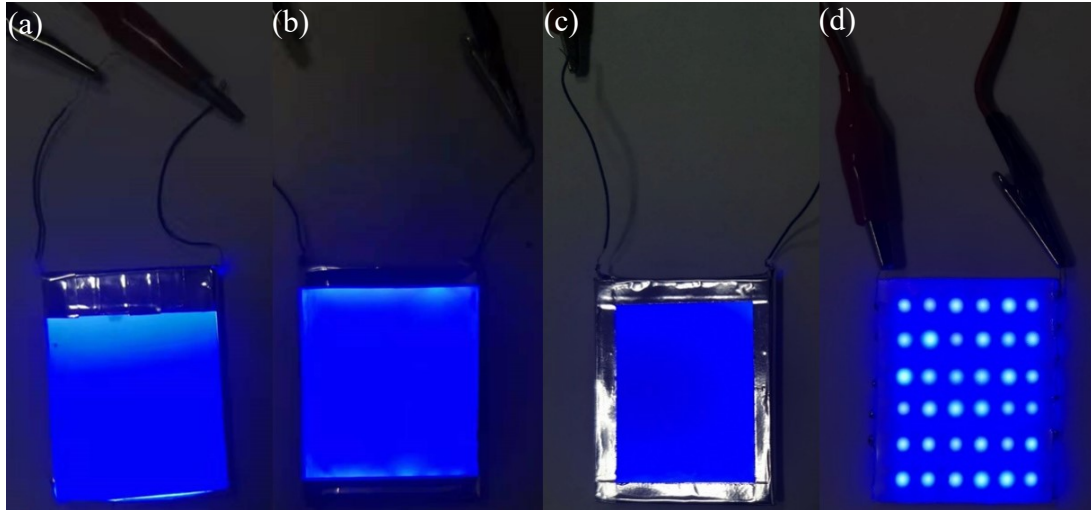

**Figure S9.** The physical pictures of the designed single-side embedded (a), double-side embedded (b), quad-side embedded (c), and straight-down (d) blue light guide panels under 3.3V applied voltage.

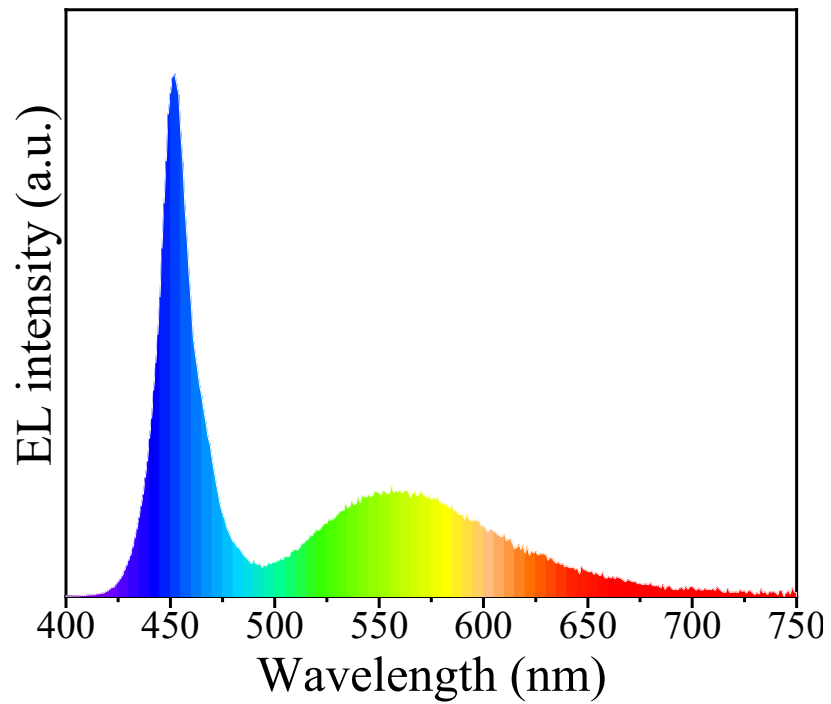

**Figure S10.** EL spectrum of a white backlight unit using a blue LED chip combined with commercial Ce: YAG yellow phosphors.

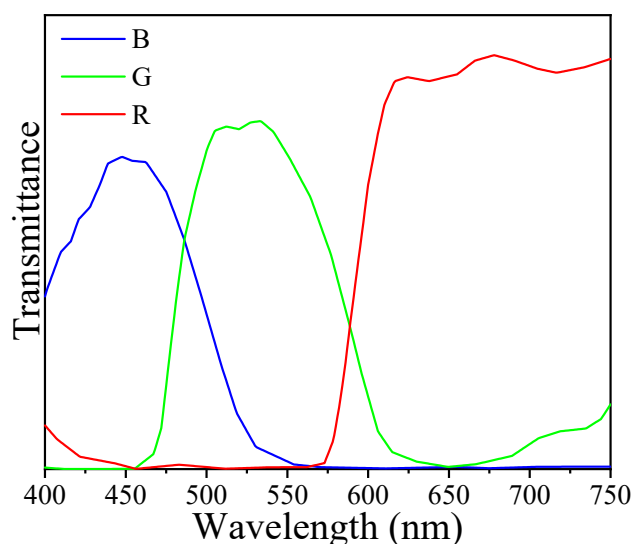

**Figure S11.** Transmittance spectra of commercial red, green, and blue (R, G, and B) color filters used in the backlit LCD.

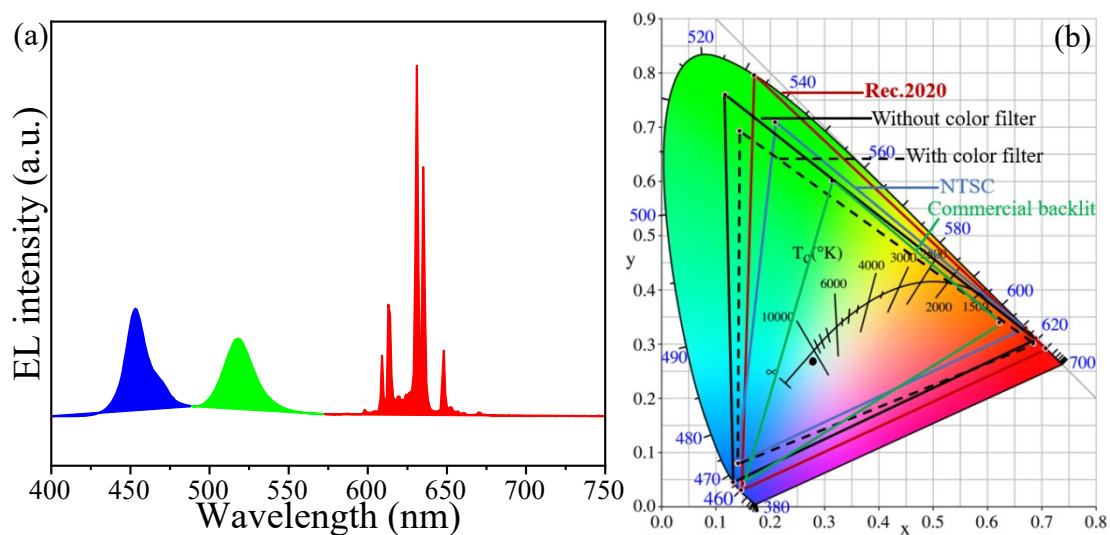

**Figure S12.** (a) EL spectra of blue LGP combined with CsPbBr<sub>3</sub>@glass@PDMS (sample B, wide FWHM) green film and Mn: KSF red film white light backlight unit. (b) Color gamut of the commercial screen (green line), the CsPbBr<sub>3</sub>@glass@PDMS film screen with and without color filters (dash line and black line), NSTC 1953 standard (blue line) and Rec. 2020 standard (red line) in the CIE diagram.
